# Supplementary material
Source: Springer Nature journal article supplement (https://www.springermedizin.de/resource/supplementary/13256_2012_2413_MOESM2_ESM.pdf/9650308)
Supplement: MOESM2 [file 9650308]

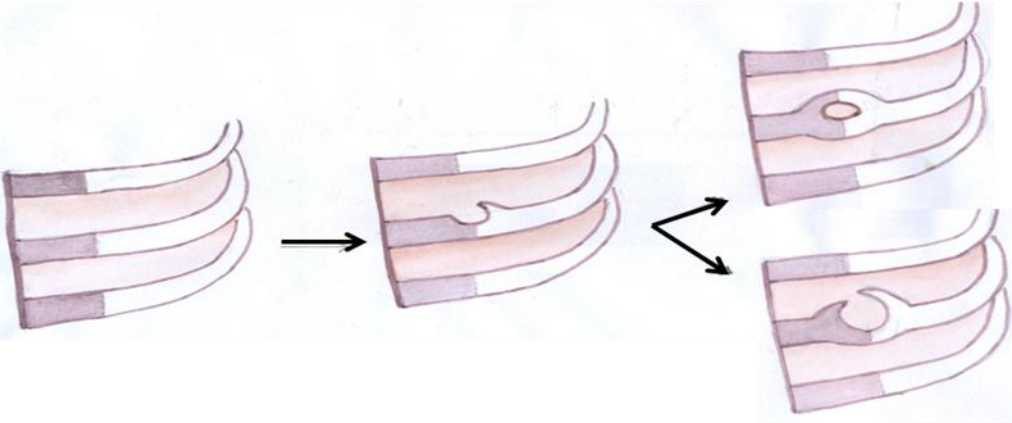

Normally developing  
ribs and their cartilages

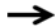

Outgrowth of a rib  
and its cartilage

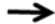

Complete or incomplete  
hole type of bifid rib and  
its cartilage
